# Supplementary material for: Effects of Different Pre-drying and Drying Methods on Volatile Compounds in the Pericarp and Kernel of Amomum tsao-ko
Source: Front Plant Sci. 2022 Feb 25;13:803776. doi: 10.3389/fpls.2022.803776 (PMC8914167; doi:10.3389/fpls.2022.803776)
Supplement: Supplementary file 2 [file Data_Sheet_2.xlsx]

## Sheet: Table S2
CAS	Formula	Name	RT(min)	Class	Name	KI	2BWP1	2BWP2	2BWP3	5BWP1	5BWP2	5BWP3	10BWP1	10BWP2	10BWP3	MHP1	MHP2	MHP3	OHP1	OHP2	OHP3	ADP1	ADP2	ADP3	SDP1	SDP2	SDP3	FDP1	FDP2	FDP3	ODP1	ODP2	ODP3	MDP1	MDP2	MDP3	EBDP1	EBDP2	EBDP3	SMDP1	SMDP2	SMDP3
66-25-1	C6H12O	100.16	5.071	Aliphatics	Hexanal	782	0	0	0	0	0	0	0	0	0	0	0	0	0	0	0	0	0	0	0	0	0	0.00285839	0.00248371	0.00349667	0.00473303	0.0056857	0.00483526	0	0	0	0	0.00285258	0	0	0	0
7785-70-8	C10H16	136.23	6.21	Monoterpenoids	(+)-α-Pinene	877	0.0151322	0.0155408	0.0145471	0.0287698	0.0162037	0.020799	0.0217104	0.0190827	0.0358066	0.0344583	0.0483975	0.0240242	0.0234422	0.0233417	0.0163202	0.0144154	0.00797527	0.0107126	0.0100737	0.00827873	0.0220131	0.00196783	0.00310579	0	0.0111132	0.0110611	0.00738856	0.0257331	0.0867618	0.0334143	0.0104913	0.0102491	0.0250644	0.019601	0.0119449	0.0160853
99-84-3	C10H16	136.23	6.862	Monoterpenoids	β-Terpinene	932	0	0.00342972	0	0	0	0	0.00350087	0.00306901	0	0.00612283	0.00623221	0.00375557	0.00416889	0	0	0.00240136	0	0	0	0	0.00350964	0	0	0	0	0	0	0	0.0128652	0.00546376	0	0.00214657	0.00345128	0	0	0
127-91-3	C10H16	136.23	6.959	Monoterpenoids	β-Pinene	944	0.0339777	0.0374152	0.0188269	0.0462111	0.0242013	0.0296292	0.0415284	0.0418014	0.0496166	0.088827	0.0840462	0.0478132	0.0517795	0.0369829	0.0364739	0.030482	0.0200469	0.031186	0.0176452	0.0206138	0.0453202	0.00537008	0	0.00462022	0.0279889	0.025591	0.0183803	0.0398124	0.194569	0.0679618	0.0310282	0.030903	0.0461581	0.0376883	0.0280188	0.0341693
124-13-0	C8H16O	128.21	7.326	Aliphatics	Octanal	953	0.0080628	0.00659613	0.00752316	0.00695577	0.00667406	0.00756146	0.0078307	0.00798739	0.00687267	0	0.00400542	0.00402884	0	0.00399814	0	0.0023962	0.00368974	0	0.00321108	0	0.00323033	0.00268566	0.00184264	0.00253868	0.0048581	0.00462018	0.00532738	0	0	0.00779292	0	0	0	0	0	0
527-84-4	C10H14	134.22	7.715	Aromatics	O-Cymene	962	0.00820276	0.00760084	0.00891172	0.00418139	0.00729589	0.00573335	0.00733834	0.00668281	0.00629476	0.00562158	0.00530829	0.00593625	0	0	0	0.00255065	0	0	0	0	0	0	0	0	0	0	0	0.00429168	0.00688616	0.00853983	0	0	0	0	0	0
5989-27-5	C10H16	136.23	7.795	Monoterpenoids	D-Limonene	970	0.00630189	0.00568561	0.00639545	0.00717486	0.00738106	0.00719881	0.00754924	0.00647781	0.00960555	0.0065461	0.00968816	0.00637087	0.00552759	0	0.00387874	0.0035963	0	0.0031423	0	0	0.0045613	0	0	0	0.00355948	0.0026472	0	0.00505333	0.0203694	0.00936033	0	0.00301899	0.00611105	0.00498715	0.00502951	0.00549593
470-82-6	C10H18O	154.25	7.858	Oxygenated monoterpenoids	1,8-Cineole	979	0.185803	0.118314	0.192744	0.201662	0.275033	0.210142	0.211379	0.197838	0.243687	0.108949	0.137718	0.136577	0.0850183	0.0545788	0.0705755	0.107274	0.0763704	0.0985896	0.0977241	0.0864465	0.113508	0.0415447	0.057021	0.0365591	0.10109	0.0637591	0.0614207	0.154823	0.285474	0.229456	0.0605489	0.076661	0.14433	0.149477	0.144388	0.150928
13877-91-3	C10H16	136.23	8.035	Monoterpenoids	β-Ocimene	983	0	0	0	0	0	0	0.00368318	0.00326761	0.00446836	0.00556421	0.00508673	0	0	0	0	0.0024681	0	0	0	0	0.00428092	0	0	0	0.00345298	0	0	0	0.0183514	0.00604884	0.00364602	0.0039311	0.00568639	0.0057504	0.0054363	0.0065723
2548-87-0	C8H14O	126.2	8.224	Aliphatics	(E)-2-Octenal	992	0.0107339	0.00989604	0.0121877	0.0111448	0.0116453	0.0103745	0.0114921	0.0118686	0.0124449	0	0.00947573	0.0105505	0.00935555	0.00909046	0.00864157	0.00950315	0.0105608	0	0.0110844	0	0.0115469	0.00890749	0.0059224	0.00909263	0.0160656	0.0128298	0.013311	0.00949276	0.0113941	0.0151816	0	0	0	0.00665005	0	0
7299-40-3	C10H18O	154.25	8.464	Oxygenated monoterpenoids	β-Terpineol	1053	0.00457446	0.00365673	0.00504247	0.00519649	0	0.00443564	0.00346406	0.00413478	0.00499824	0.00437211	0.00419843	0.00516143	0.00507843	0.00490742	0.00444319	0.00571399	0.00497602	0.00461596	0.00589501	0.00441401	0.00641066	0.00273007	0.00322758	0.00283741	0.00770084	0.00602188	0.00614506	0.00364283	0.00495324	0.00511787	0.0040297	0.00312247	0.00540914	0.0033887	0	0
90-05-1	C7H8O2	124.14	8.687	Aromatics	Guaiacol	1060	0	0	0	0	0	0	0	0	0	0	0	0	0	0	0	0	0	0	0	0	0	0	0	0	0	0	0	0	0	0	0	0	0	0.00665005	0.00762907	0.00778902
15232-85-6	C11H20	152.28	8.893	Aromatics	1-Pentylcyclohexene	1084	0.0100112	0.00790005	0.0101087	0.00769131	0	0.00827476	0.00292972	0.00435549	0.00867424	0	0	0	0	0	0	0	0	0	0	0	0	0	0	0	0	0	0	0	0	0	0	0	0	0	0	0
89-79-2	C10H18O	154.25	8.962	Oxygenated monoterpenoids	Isopulegol	1098	0	0	0	0.0095746	0.0087785	0	0	0	0	0	0	0	0	0	0	0	0	0	0	0	0	0	0	0	0	0	0	0	0	0	0	0	0	0.00617846	0.00511117	0.00567449
3570-04-5	C10H16O	152.23	9.357	Oxygenated monoterpenoids	Camphenol	1009	0	0	0	0	0	0	0	0	0	0	0.00439956	0	0.00577778	0.00717115	0.005034	0.0057534	0	0.00542295	0.00417478	0.00528948	0.00587987	0	0	0	0	0	0	0.00389681	0	0	0	0	0	0.00617846	0	0
38651-65-9	C9H14O	138.21	9.563	Aliphatics	(1R)-(+)-Nopinone	1112	0.00257798	0.00541766	0.00223357	0	0	0.00616433	0.0028278	0.00297406	0.00313255	0	0.00496965	0.005112	0.00759357	0.00841752	0.00577326	0.0077837	0.00458311	0.00825444	0.00554486	0.00656788	0.00650194	0.0030211	0.00290642	0.00353501	0.00565382	0.00521674	0.00607641	0.00479288	0.00466822	0	0.00581974	0.00405198	0.00579728	0.00381513	0.00373551	0
25152-84-5	C10H16O	152.23	9.883	Oxygenated monoterpenoids	(E,E)-2,4-Decadienal	1130	0	0	0	0	0	0	0	0	0	0	0	0	0	0	0	0	0	0	0.00352902	0	0	0.00428273	0.00268026	0.00410362	0	0	0.00829297	0	0	0	0.01044	0.00630152	0.00801459	0	0	0
30460-92-5	C10H14O	150.22	9.935	Oxygenated monoterpenoids	Pinocarvone	1153	0	0	0	0	0	0	0	0	0	0	0.00422299	0	0.0052638	0.00515886	0.00337271	0.00545524	0.00300973	0.00520786	0.00368513	0.0045236	0.00550529	0.0022722	0.00220505	0.00212172	0.00424736	0.00493607	0.00447587	0	0.00474342	0	0	0.00283292	0.00359996	0	0	0
78-70-6	C10H18O	154.25	10.032	Oxygenated monoterpenoids	Linalool	1160	0	0	0	0	0	0	0	0	0	0	0	0	0	0	0.00379239	0.00576332	0.00445291	0.00660537	0.0099558	0.0059504	0.00877845	0.00440999	0.00755173	0.00378585	0.00784032	0.0050186	0.00644248	0	0	0	0.00717949	0.012643	0.0116323	0.00724131	0.0105936	0.00715637
507-70-0	C10H18O	154.25	10.095	Oxygenated monoterpenoids	Borneol	1171	0	0	0	0	0	0	0	0	0	0.00861937	0.00438379	0.00357666	0.0074848	0.0106019	0.00809748	0.0130438	0.0104525	0.00897491	0.0110168	0.0103773	0.0130803	0.00507562	0.00502876	0.003939	0.0106586	0.0114936	0.0103653	0.00306959	0.00490596	0	0.00790654	0.00840035	0.00832778	0.00953516	0.0066935	0.00856534
124-19-6	C9H18O	142.24	10.101	Aliphatics	Nonanal	1191	0	0	0	0	0	0	0.00879931	0.0090951	0.00867424	0	0	0	0.00906022	0.0112998	0.0093831	0.0114444	0.0125253	0.0106467	0.0113632	0.0107258	0.0117699	0	0	0.00768219	0.0138113	0.0137911	0.0141228	0.00888146	0.0106997	0.0159734	0.0112388	0.0104551	0.00534744	0.015144	0	0
562-74-3	C10H18O	154.25	10.209	Oxygenated monoterpenoids	4-Terpineol	1197	0.00650661	0.00572795	0.00641734	0.00948062	0.00994708	0.00783115	0.00865726	0.0104651	0.0095388	0.00766797	0.00473113	0.00580279	0.00602579	0.00784153	0.00687577	0.00945594	0.00840876	0.00759593	0.00852026	0.00641534	0.0091392	0.00508252	0.00520427	0.00447236	0.01008	0.00742782	0.00797935	0.00729572	0.010477	0.00959943	0.00599829	0.00596697	0.00608146	0.010774	0.00766381	0.00910349
554-61-0	C10H16	137.23	10.438	Monoterpenoids	2-Carene	1203	0.0525084	0.0481204	0.0515365	0.0744318	0.0750471	0.0660818	0.0663735	0.0713728	0.0755175	0.0709418	0.0495475	0.060607	0.0646038	0.0775207	0.0661542	0.0740711	0.0700852	0.0535002	0.0703164	0.0523973	0.076559	0.0421514	0.037748	0.0370805	0.0814669	0.0759029	0.0754537	0.0622651	0.073516	0.0825238	0.0428593	0.0390594	0.0533195	0.0687937	0.0502297	0.0572406
112-31-2	C10H20O	156.26	10.547	Oxygenated monoterpenoids	Decanal	1214	0	0.0060992	0	0.00482267	0	0.00347833	0.00440612	0.00784248	0.00296516	0.0101266	0.00465796	0.0047854	0.00251066	0.00792646	0.00628279	0.00462666	0.0069458	0	0.00503163	0.00678956	0.00500473	0.00450646	0	0.0042814	0.00497531	0.00549183	0.00591136	0.00245127	0.00783387	0.00826445	0.00960895	0	0	0	0	0
1196-01-6	C10H14O	150.22	10.656	Oxygenated monoterpenoids	(-)-Verbenone	1223	0	0.00838196	0	0	0	0	0.00725558	0.0104805	0	0	0	0	0	0.00590163	0.0043846	0.00651429	0.00383357	0.00536719	0.00451443	0.00557489	0.00586284	0.00268335	0	0	0	0	0	0	0	0	0	0	0.0044764	0.00404873	0	0
106-22-9	C10H20O	156.26	10.89	Oxygenated monoterpenoids	Citronellol	1231	0	0	0	0	0	0	0	0	0	0	0	0	0	0	0	0.00592321	0.00586941	0.00475532	0	0	0.00560549	0.00472835	0	0	0	0	0	0	0	0	0	0	0	0	0	0
106-26-3	C10H16O	152.23	11.136	Oxygenated monoterpenoids	(Z)-Citral	1239	0.0765902	0.0647134	0.0744996	0.0955489	0.0853243	0.0787168	0.0790015	0.0919844	0.0949178	0.063148	0.0443941	0.0640385	0.0597308	0.0704285	0.0609359	0.0677911	0.0767661	0.0160298	0.0807232	0.017385	0.081128	0.0647389	0.0300305	0.0563731	0.12546	0.105343	0.110164	0.0627715	0.0792783	0.0842112	0.0381726	0.0087519	0.0412857	0.0438475	0.0114684	0.0333745
106-24-1	C10H18O	154.25	11.342	Oxygenated monoterpenoids	Geraniol	1255	0.0224333	0.0196794	0.0208205	0.0161819	0.0179211	0.0122754	0.0186102	0.0178821	0.020395	0.0128717	0.00913765	0.0213126	0.012618	0.0115732	0.00838804	0.00366317	0	0	0.0054161	0	0.00816764	0.0647389	0.0060388	0.0101546	0.0065306	0.0168722	0.0139002	0.00672372	0.0281465	0.0203488	0	0	0.00943289	0.0182612	0	0.00605692
2497-25-8	C10H18O	154.25	11.6	Oxygenated monoterpenoids	(Z)-2-Decenal	1262	0.181899	0.202154	0.21701	0.250338	0.230729	0.188029	0.181603	0	0.208308	0.174812	0.154428	0.160222	0.134845	0.17941	0	0.104774	0.150662	0.0491096	0.136079	0.0804083	0.137842	0.107854	0.0462301	0.0997618	0.214115	0.190414	0.211383	0.110488	0.244233	0.179277	0.177909	0.0559217	0.11715	0.0562285	0.0452496	0.0621221
5392-40-5	C10H16O	152.23	11.714	Oxygenated monoterpenoids	Citral	1272	0.170089	0.146231	0.171068	0.216399	0.184126	0.174519	0.166477	0.211222	0.219586	0.146595	0.107466	0.146964	0.121098	0.139016	0.119721	0.11525	0.131987	0.0294825	0.128812	0.0276474	0.139552	0.117218	0.0447236	0.101903	0.216499	0.188384	0.188424	0.123749	0.153176	0.173676	0.0801142	0.0150405	0.0895672	0.0707269	0.0228045	0.0548185
2785-89-9	C9H12O2	152.19	11.863	Aromatics	4-Ethylguaiacol	1309	0	0	0	0	0	0	0	0	0	0	0	0	0	0	0	0	0	0	0	0	0	0	0	0	0	0	0	0	0	0	0	0	0	0.00730748	0.00763782	0.0079631
51932-70-8	C10H10O	146.19	13.625	Aromatics	2,3-Dihydro-1H-indene-4-carbaldehyde	1331	0.030683	0.0290711	0.0333912	0.0360592	0.0341264	0.0337564	0.0301779	0.0331977	0.0347243	0.0342485	0.0293021	0.0382223	0.0116241	0.0152329	0.0121659	0.00731127	0.00970721	0	0.0107845	0	0.0102363	0.00820395	0.0048969	0.0075898	0.0131906	0.0151569	0.0137427	0.0423418	0.0411948	0.0587097	0.00896184	0.00702796	0.01331	0.0328447	0.0108057	0.0301478
101-39-3	C10H10O	146.19	14.587	Aromatics	α-Methylcinnamaldehyde	1346	0.019889	0.0173296	0.0187216	0.0177766	0.0297268	0.0178546	0.0344275	0.0350596	0.0369033	0.0202147	0.00899627	0.0205055	0	0	0	0	0	0	0	0	0	0.00767776	0.00601928	0.00785058	0	0	0	0.0344476	0.027924	0.0436142	0.0124462	0.00987229	0.0218095	0.021538	0.0108057	0.0174282
634-36-6	C9H12O3	168.19	16.572	Aromatics	1,2,3-Trimethoxybenzene	1353	0	0	0	0	0	0	0	0	0	0	0	0	0	0	0	0	0	0	0	0	0	0	0	0	0	0	0	0	0	0	0	0	0	0.0115851	0.028277	0.0118445
5912-86-7	C10H12O2	164.2	16.79	Aromatics	(Z)-Isoeugenol	1380	0	0	0	0	0	0	0	0	0	0	0	0	0	0	0	0	0	0	0	0	0	0	0	0	0	0	0	0	0	0	0	0	0	0.0129577	0.0188011	0.0162415
25246-27-9	C15H24	204.35	17.236	Sesquiterpenoids	Alloaromadendrene	1392	0	0	0	0	0	0	0	0.00523638	0	0	0	0	0	0	0	0	0	0	0	0	0	0	0	0	0	0	0	0	0.0161874	0	0	0	0	0.0061752	0.00740342	0.00662279
4826-62-4	C12H22O	182.3	17.35	Aliphatics	(E)-2-Dodecenal	1422	0.166407	0.143519	0.169808	0.172238	0.177494	0.125405	0.144193	0.161021	0.145356	0.180335	0.124329	0.145328	0.110964	0.149368	0.124457	0.0727058	0.113167	0.0479445	0.0738064	0.0644175	0.0936818	0.0745805	0.034501	0.0739838	0.134931	0.167453	0.152848	0.126267	0.265663	0.203682	0.242958	0.0978595	0.153322	0.0419222	0.043418	0.0367891
483-75-0	C15H24	204.35	17.591	Sesquiterpenoids	α-Muurolene	1439	0.0106814	0.0105913	0.00936692	0.0175603	0.0134865	0.0119987	0.0136894	0.0133155	0.0138718	0.0130564	0.0107025	0.00908875	0.0111032	0.00963539	0.00956768	0.0097096	0.0112029	0.0129837	0.00815082	0.00887626	0.0109474	0.00554863	0.00866853	0.00510811	0.00882169	0.0113977	0.0126898	0.0102657	0.042527	0.014685	0.0175874	0.0183138	0.0188711	0.0183602	0.0218744	0.0195823
13744-15-5	C15H24	204.35	17.774	Sesquiterpenoids	β-Cubebene	1442	0.00662932	0.00735982	0.00746576	0.0100756	0	0.00847983	0.00736709	0.0072318	0.00800038	0.0062406	0	0	0.00456376	0.00393667	0.00606245	0.00466779	0.00608662	0	0	0	0.0056588	0.00913763	0.00947341	0.00896266	0.00601654	0.00705596	0.00737129	0	0.018241	0.00931687	0.0154112	0.0100386	0.0142439	0.0117764	0.0105971	0.0127227
317819-78-6	C15H24	204.35	18.129	Sesquiterpenoids	β-Copaene	1454	0.0306289	0.0283178	0.0181836	0.0129734	0	0.0031985	0.00784023	0.0110025	0.00306854	0	0	0	0	0	0	0.0149201	0.00475879	0.0061519	0	0	0.00971219	0.00417907	0.00395939	0.00342416	0.016504	0.0209539	0.0183824	0	0	0	0.0571088	0.0689386	0	0.0172052	0	0
30021-74-0	C15H24	204.35	18.598	Sesquiterpenoids	γ-Muurolene	1471	0.0171356	0	0	0.0435778	0.0283026	0.0340713	0.0250697	0.0294006	0.0337856	0.0485548	0.0380711	0.0363648	0.0441785	0.034082	0.0449457	0.0606641	0.0615715	0.0617684	0.0417167	0.0443014	0.0599374	0.0252064	0.0286215	0.021449	0.0395953	0.0551379	0.0485645	0.0357854	0.0785139	0	0	0.0153192	0.0677711	0.0760716	0.088229	0.0717046
639-99-6	C15H26O	222.37	19.319	Oxygenated sesquiterpenoids	Elemol	1491	0.00795186	0	0	0.00842768	0	0	0	0	0	0.0137733	0.00987381	0.00952987	0.0107317	0.0130552	0.013041	0.0143377	0.0223056	0.0152416	0.0120601	0.0163958	0.0152794	0.0125515	0.00911585	0.00941725	0.0162088	0.0203035	0.0221672	0.0100311	0.0162814	0.0256864	0.0486954	0.0423621	0.0444273	0.0399399	0.0432478	0.0518983
40716-66-3	C15H26O	222.37	19.571	Oxygenated sesquiterpenoids	Nerolidol	1506	0.0627019	0.0471988	0.0433437	0.0667029	0.0571623	0.0703368	0.0433663	0.0420302	0.0600001	0.113915	0.0709075	0.0628214	0.0688781	0.0784924	0.102578	0.0786282	0.0879567	0.0874504	0.0773122	0.0692894	0.0792843	0.0425248	0.0428002	0.0266139	0.08624	0.0713018	0.0886725	0.0703633	0.0887631	0.127264	0.136266	0.152861	0.159695	0.134704	0.0994153	0.115349
17334-55-3	C15H24	204.35	19.897	Sesquiterpenoids	Calarene	1510	0	0	0	0	0	0	0	0	0	0.00789023	0.0109731	0.00332489	0	0	0	0.00549744	0.00663258	0.00602036	0	0.0071236	0.00473129	0.00460595	0	0	0	0.00987145	0.00985073	0.0125104	0.0220259	0	0	0.00824447	0.0244602	0	0.0145729	0.0141637
5951-67-7	C15H24	204.35	19.982	Sesquiterpenoids	α-Elemen	1527	0	0	0	0	0	0	0	0	0	0	0	0	0	0	0	0	0	0	0	0	0	0	0	0	0	0	0	0	0	0.0288328	0.0221421	0.0263525	0	0	0	0
16728-99-7	C15H24	204.35	20.938	Sesquiterpenoids	1,4-Cadinadiene	1563	0	0	0	0	0	0	0	0	0	0	0	0	0	0	0	0.00522162	0	0.00538302	0	0	0.00596259	0	0	0	0	0	0	0	0	0	0	0.0078388	0.00776905	0.0059876	0	0
1209-71-8	C15H26O	222.37	21.012	Oxygenated sesquiterpenoids	γ-Eudesmol	1582	0	0	0	0	0	0	0	0	0	0	0	0	0	0.0094347	0.0110084	0.00984424	0.0114751	0.00964137	0.00911117	0.00841912	0.00898673	0.00608857	0.0049586	0.00415788	0.00832174	0.00867408	0.00790769	0.00772135	0.0105411	0.0116661	0.0115502	0.0168886	0.0116478	0.0141771	0.0112356	0.0117261
3856-25-5	C15H24	204.35	21.276	Sesquiterpenoids	Copaene	1591	0	0	0	0	0	0	0.00522416	0.00511862	0.00639626	0	0.00526559	0	0.00607622	0.00671025	0.00648789	0.00610808	0.00595253	0.00618697	0	0.00450814	0.00682273	0	0	0	0	0	0	0.00588352	0.00972031	0	0	0	0	0.00657944	0	0
5154-01-8	C5H5NO2	111.1	21.344	Others	2,5-Dihydroxypyridine	1607	0.0135772	0	0	0	0	0	0.00541437	0.00545189	0	0.0137466	0.00725408	0	0	0.00812134	0.0117485	0.010083	0.00946644	0.0112116	0.00727645	0.00806205	0.00949739	0.0093374	0.00733054	0.00813642	0.0150061	0.0175212	0.0167339	0.00663841	0.0110296	0.0188168	0.0145039	0.0242168	0	0	0	0
473-16-5	C15H26O	222.37	21.459	Oxygenated sesquiterpenoids	α-Eudesmol	1615	0.0168166	0.0176009	0.0172734	0.0252389	0.0197701	0.0264415	0.0195781	0.0211544	0.0242709	0.0399468	0.0285746	0	0.0288438	0.0365071	0.0384264	0.0321603	0.0346181	0.0347606	0.0331014	0.0274776	0.0328839	0.0227801	0.0190999	0.0173186	0.0312086	0.0333528	0.0287662	0.031527	0.0434531	0.0485438	0.0372741	0.046686	0.0364586	0.0451811	0.0366917	0.0386551
60609-53-2	C17H32O	252.4	21.705	Aliphatics	(Z)-14-Methylhexadec-8-enal	1675	0.0205305	0.0133883	0.0119693	0.0138364	0.0119257	0.0100578	0.0141746	0.0178901	0.00994439	0.0268681	0.0103673	0.00972051	0.00589689	0.0104025	0.00941068	0.00796434	0.00818475	0.00914778	0	0.00706177	0.00683498	0	0	0	0.0108938	0.0122882	0.0118687	0.00865252	0.00703263	0.0196959	0.0146564	0.0125186	0.0135986	0	0	0
486-25-9	C13H8O	180.2	22.82	Aromatics	9-Fluorenone	1670	0	0	0	0	0	0	0	0	0	0	0	0	0	0	0	0	0	0	0	0	0	0	0	0	0	0	0	0	0	0	0	0	0	0.00839417	0.00825892	0.0076318
4602-84-0	C15H26O	222.37	23.942	Oxygenated sesquiterpenoids	Farnesol	1682	0	0	0	0	0	0	0	0	0	0	0	0	0	0	0	0	0	0	0	0	0	0	0	0	0.00523399	0.00754715	0.00624937	0	0	0	0.00724371	0.00461669	0.0093327	0.00696963	0	0
53783-87-2	C7H10O	110.15	24.394	Aliphatics	Bicyclo[2.2.1]hept-2-en-7-ol	1709	0.0360059	0.0191639	0.00962248	0.017931	0.00991389	0.0138105	0.021435	0.0352855	0.0114918	0.0638416	0.0163804	0.0106882	0.00791604	0.0122609	0.017646	0.0123088	0.00680354	0.0161176	0.00457385	0	0.0103622	0.00331168	0.00257057	0.00229878	0.0142709	0.00980962	0.00956712	0.00989612	0.0327057	0	0.00904842	0.00720958	0.0149466	0	0	0
57-10-3	C16H32O2	256.42	26.042	Aliphatics	Palmitic Acid	1820	0	0	0	0	0	0	0.00378175	0.00482697	0.00551237	0.0156761	0.0074095	0.0143227	0.00652824	0.0074752	0.00857916	0.075745	0.0829536	0.0618048	0.0985203	0.0546721	0.0698733	0.0763091	0.0708134	0.0534192	0.0434146	0.0450984	0.048298	0	0.00635988	0.0105355	0.0327254	0.0350593	0.0367447	0.0111568	0.0207206	0.0153698
142-50-7	C15H26O	222.37	26.815	Oxygenated sesquiterpenoids	D-Nerolidol	1858	0	0	0	0	0	0	0	0.0056647	0.00551237	0.0105075	0	0	0	0	0.00964062	0.00599093	0	0.00707978	0.0061607	0.00490441	0.00583982	0.00258746	0.00480054	0	0.00691324	0	0	0	0	0.0106417	0	0	0.0163199	0.00587677	0.00554333	0.00771785
7212-44-4	C15H26O	222.37	26.82	Oxygenated sesquiterpenoids	trans-Nerolidol	1869	0	0.0055423	0	0	0	0.00867208	0	0	0	0	0	0	0	0	0	0	0	0	0	0	0	0	0	0	0	0	0	0	0	0	0.0180557	0.0162087	0	0	0	0
1454-84-8	C19H40O	284.5	27.564	Aliphatics	1-Nonadecanol	2009	0.0138557	0	0	0	0	0.00617766	0.00515132	0.00732965	0.00659222	0	0	0	0.0058309	0.00538911	0.00717429	0.00822716	0.00473224	0.00511493	0.00345996	0	0.00412816	0.00701067	0.00923346	0.00867314	0.00691963	0.00841985	0.0121724	0.00558442	0	0	0.00843531	0.0108313	0.00869302	0	0	0
60-33-3	C18H32O2	280.4	28.148	Aliphatics	Linoleic acid	2128	0	0	0	0	0	0	0	0	0	0	0	0	0	0	0	0.00822716	0.00473224	0.00511493	0.0163079	0.0070708	0.00881283	0.0209789	0.0160608	0.0129999	0.00784891	0.00775412	0.0153104	0	0	0	0.0154848	0.0128736	0.0156547	0	0.0127113	0
56554-30-4	C17H28O2	264.4	30.013	Aliphatics	7,10,13-Hexadecatrienoic acid, methyl ester	2285	0	0	0	0	0	0	0	0	0	0	0	0	0	0	0	0	0	0	0.00504773	0	0	0.0214172	0	0.0116947	0	0	0.0103713	0	0	0	0.0111103	0	0.0111717	0	0.0083539	0

## Sheet: Table S3
CAS	Formula	Name	RT(min)	Class	Name	KI	2BWK1	2BWK2	2BWK3	5BWK1	5BWK2	5BWK3	10BWK1	10BWK2	10BWK3	MHK1	MHK2	MHK3	OHK1	OHK2	OHK3	ADK1	ADK2	ADK3	SDK1	SDK2	SDK3	FDK1	FDK2	FDK3	ODK1	ODK2	ODK3	MDK1	MDK2	MDK3	EBDK1	EBDK2	EBDK3	SMDK1	SMDK2	SMDK3
7785-70-8	C10H16	136.23	6.215	Monoterpenoids	(+)-α-Pinene	877	0.0206466	0.0165105	0.0278521	0.0248691	0.0320754	0.0334772	0.0193534	0.0291244	0.0189084	0.0227971	0.0219506	0.0291444	0.0198622	0	0	0.0213416	0	0	0	0.010552	0.0218259	0.0147911	0	0	0	0	0.0206293	0.0132769	0.0126632	0	0	0	0	0.0128518	0	0.0208648
555-10-2	C10H16	136.23	6.862	Monoterpenoids	β-Phellandrene	949	0.00539289	0.00361405	0	0	0.0087229	0.00608235	0	0.00591924	0	0.0102222	0	0.0094654	0	0	0	0.0134654	0	0	0	0.0125729	0.0113855	0.00799398	0	0	0	0	0.0128312	0	0	0	0	0	0	0	0	0
3779-61-1	C10H16	136.23	6.965	Monoterpenoids	(E)-β-Ocimene	953	0.0111369	0.0109958	0.0109073	0.010274	0.0108016	0.0123793	0.00826915	0.00986508	0.00471557	0.0112355	0	0.00977083	0	0	0	0	0	0	0	0	0	0.00858242	0	0	0	0	0.00762405	0	0	0	0	0	0	0	0	0
127-91-3	C10H16	136.23	7.102	Monoterpenoids	β-Pinene	959	0.00593204	0	0.01012	0.00767672	0.00507926	0.00439754	0	0.00544797	0.00418048	0.0119067	0	0.0107203	0	0	0	0.0154397	0	0.017188	0	0.0172379	0.0124846	0.00858242	0	0	0	0	0.0157384	0	0	0	0	0	0	0.00800137	0	0
124-13-0	C8H16O	128.21	7.331	Aliphatics	Octanal	966	0.0294146	0.0306785	0.0282278	0.0328756	0.0286145	0.0336297	0.0228304	0.0335888	0.0239016	0.029761	0.0321363	0.0421579	0.0576483	0.0497442	0.0444162	0.0393047	0.0365928	0.0573354	0.072368	0.0555213	0.0499433	0.0476299	0.0413359	0.0549252	0.0346228	0.0424411	0.053274	0.0291105	0.0332691	0.0302479	0.026527	0.0235215	0.0183148	0.0331723	0.0296749	0.0326392
99-83-2	C10H16	136.23	7.417	Monoterpenoids	α-Phellandrene	980	0.0800157	0.0506665	0.149868	0.0540539	0.100587	0.0604767	0.0712502	0.0759785	0.0710954	0.178098	0.0446652	0.145028	0.0915946	0.0773494	0.0315433	0.114336	0.0180602	0.144797	0.0791764	0.148027	0.13741	0.0660707	0.0447723	0	0.0308243	0.0241184	0.212427	0.0235053	0.0326842	0.0250779	0.127052	0.022282	0.016302	0.134048	0.0429835	0.178174
527-84-4	C10H14	134.22	7.715	Aromatics	O-Cymene	992	0.0287969	0.0263826	0.034587	0.0144619	0.0254021	0.0175136	0.0202521	0.0215961	0.017626	0.0409887	0.015129	0.0381686	0.0266188	0.0198827	0.0124968	0.0368537	0.0165804	0.0427177	0.0291286	0.0416538	0.0329272	0.0194629	0	0.0308895	0.0124511	0.0145173	0.0443344	0.014362	0.0143257	0.0164705	0.0399989	0	0	0.0311694	0.0142417	0.0327399
5989-27-5	C10H16	136.23	7.795	Monoterpenoids	D-Limonene	1000	0.040421	0.0296724	0.0672182	0.0336382	0.063209	0.0382584	0.0318999	0.0487866	0.0379957	0.0828658	0.0307221	0.0690118	0.0535527	0.0439658	0.0205161	0.0725836	0	0.0809749	0.0493468	0.103619	0.0756747	0.0493192	0.0203045	0.0357364	0.0179379	0.0128974	0.0979644	0.0173653	0.0183665	0.018226	0.0661606	0.0136081	0.00943289	0.0760513	0.0230327	0.0716603
470-82-6	C10H18O	154.25	7.858	Oxygenated monoterpenoids	1,8-Cineole	1012	1.2852	1.10184	1.7131	1.56452	1.98303	1.72773	1.28525	2.29407	1.13437	2.11085	1.92872	2.11519	2.74213	2.17706	1.57844	2.11635	0.9233	1.93857	1.85389	2.55762	2.12784	1.93219	1.3182	1.36395	0.949433	1.17013	2.43967	1.31089	1.21791	1.18072	1.61763	0.972067	0.771583	1.8033	1.61799	2.4274
13877-91-3	C10H16	136.23	8.041	Monoterpenoids	β-Ocimene	1023	0.0222226	0.0162994	0.0351209	0.0174272	0.0373908	0.0193898	0.0117373	0.0253409	0.0193798	0.0576796	0.012534	0.0484299	0.0426557	0.0322485	0.0186135	0.051446	0	0.0626319	0.0364522	0.0625441	0.0440082	0.0380478	0.0161715	0.0276123	0.0139541	0.012352	0.0662083	0	0	0.011801	0.0419255	0	0	0.0395438	0.0108897	0.0341365
2548-87-0	C8H14O	126.2	8.23	Aliphatics	(E)-2-Octenal	1049	0.0515362	0.0445855	0.0529235	0.0545418	0.0303211	0.053642	0.0408947	0.0603498	0.0444226	0.0971895	0.060835	0.104751	0.192646	0.170462	0.133282	0.153905	0.0995667	0.19024	0.213906	0.226386	0.156865	0.176028	0.127728	0.16537	0.108984	0.124037	0.184738	0.0726302	0.0595055	0.0722981	0.166924	0.0960238	0.0592536	0.110456	0.0720694	0.0890993
7299-40-3	C10H18O	154.25	8.464	Oxygenated monoterpenoids	β-Terpineol	1085	0.0174296	0.0173858	0.018008	0.0186157	0.0178024	0.0193548	0.00784804	0.0161885	0.00832858	0.0343247	0.029914	0.0341046	0.0532573	0.0460774	0.0455507	0.0492917	0.0372526	0.0471354	0.0425129	0.0542673	0.0537431	0.044248	0.035012	0.0389591	0.0355583	0.0430565	0.0463385	0.0254107	0.0223693	0.0228494	0.0375332	0.035468	0.0266489	0.0199351	0.0257235	0.0336205
78-70-6	C10H18O	154.25	8.893	Oxygenated monoterpenoids	Linalool	1100	0	0	0	0.0188927	0.00725038	0.012718	0	0.0207254	0	0	0	0	0	0	0	0	0	0	0.0179945	0	0.0159706	0.024136	0	0.0266518	0.0117025	0.00675515	0.0110123	0	0	0.00925776	0.0148303	0.013159	0.0179894	0.00921056	0.0107768	0.0210929
471-84-1	C10H16	136.23	8.962	Monoterpenoids	α-Fenchene	1107	0.0145195	0.0137964	0.0128304	0.0167733	0.0136396	0.0164132	0.00819804	0.014226	0.00698121	0.017976	0.0168895	0.0173233	0.0259731	0.0241463	0.0257787	0.029092	0.0271221	0.0313339	0.0219708	0.0281162	0.0290043	0.0264818	0.022565	0.023888	0.0206918	0.0277236	0.0255567	0.0176697	0.0165148	0.0165148	0.0228855	0.0211735	0.0174998	0.0100023	0.0142547	0.0182557
507-70-0	C10H18O	154.25	10.095	Oxygenated monoterpenoids	Borneol	1131	0	0.0062373	0.00995367	0	0.0103609	0.0158326	0	0	0	0	0	0	0	0	0	0	0	0	0	0	0	0.0146511	0.0106102	0	0.0137615	0.0112604	0	0	0	0.00724017	0	0	0	0	0	0
37050-05-8	C9H16	124.22	10.129	Aliphatics	7-Methyl-3,4-octadiene	1139	0.0228295	0.0163831	0.0187703	0.0109096	0.0139088	0.0150867	0.0155127	0.0155448	0.0260821	0.0304231	0	0.0306687	0.0463709	0.0352048	0.0381843	0.0535941	0.0456854	0.0428215	0.0444466	0.04519	0.050858	0.0364593	0.0320478	0.0456035	0.0267648	0.0353109	0.0366291	0.0252382	0.0213095	0.0169445	0.0449286	0.0359045	0.0387931	0.0383943	0.0309141	0.0407319
562-74-3	C10H18O	154.25	10.215	Oxygenated monoterpenoids	4-Terpineol	1143	0.0383204	0.0323925	0.0391701	0.0443537	0.0499942	0.0534705	0.0450513	0.0647863	0.0439691	0.0397051	0.0320633	0.0392071	0.0438292	0.0416467	0.0403367	0.055309	0.0445854	0.0434907	0.0420105	0.0523326	0.0500545	0.0438451	0.0383393	0.039259	0.0384049	0.0527038	0.0454685	0.0478339	0.0414278	0.0414278	0.0511924	0.0461677	0.0381117	0.0542065	0.0623847	0.0805676
554-61-0	C10H16	137.23	10.438	Monoterpenoids	2-Carene	1151	0.250447	0.218776	0.301529	0.306471	0.311119	0.332905	0.282828	0.374841	0.254557	0.350025	0.384932	0.351487	0.410164	0.404222	0.416639	0.362114	0.322502	0.372128	0.35466	0.433579	0.459495	0.329978	0.28828	0.31832	0.314958	0.424892	0.357524	0.354932	0.333408	0.333408	0.355964	0.354392	0.29937	0.304559	0.391305	0.506199
112-31-2	C10H20O	156.26	10.553	Oxygenated monoterpenoids	Decanal	1174	0.0133816	0.0152035	0.0122985	0.0271615	0.0267673	0.0269843	0.0118416	0.0178631	0.0203433	0.0112958	0	0.0162857	0.0205716	0.0101872	0.01883	0.0181436	0.0237844	0.0221154	0.041164	0.0245203	0.0181583	0.0302986	0	0.0392695	0.0370971	0.0174832	0.0160397	0.0183715	0.0309072	0.0309072	0	0	0.0262799	0.0126703	0.0227994	0
106-22-9	C10H20O	156.26	10.89	Oxygenated monoterpenoids	Citronellol	1192	0.0115974	0.0100498	0	0.0105678	0.00682262	0.00736652	0.00793244	0.010603	0.0118997	0	0	0.0104275	0.0177212	0	0.0164638	0	0	0	0.0118654	0.0133211	0	0.0138948	0	0	0.00968141	0.0182756	0.0150269	0	0	0	0.015106	0	0	0	0.0110693	0
1124-27-2	C10H18	138.25	10.902	Monoterpenoids	4(8)-P-Menthene	1209	0.00608703	0	0	0.0070108	0.0076687	0.00564246	0	0.00656648	0	0	0	0.00946329	0	0	0.0100274	0	0	0.0253235	0	0.0140824	0	0	0	0	0.0120492	0.0164793	0.0123123	0	0	0	0	0	0	0	0	0
106-26-3	C10H16O	152.23	11.136	Oxygenated monoterpenoids	(Z)-Citral	1239	0.476693	0.402558	0.573413	0.581759	0.454972	0.541569	0.532726	0.703912	0.728767	0.618463	0.560926	0.575357	0.703739	0.545431	0.58727	0.508037	0.551611	0.533051	0.58564	0.575052	0.642308	0.493824	0.491614	0.544078	0.498389	0.579103	0.470635	0.604624	0.523835	0.523835	0.717317	0.63579	0.654063	0.916867	0.94391	1.06331
106-24-1	C10H18O	154.25	11.342	Oxygenated monoterpenoids	Geraniol	1246	0.143266	0.165962	0.149919	0.150215	0.11904	0.124019	0.177055	0.161213	0.190559	0.125373	0.368223	0.208769	0.283909	0.199992	0.169734	0.0850007	0.12832	0.103036	0.198862	0.2183	0.203452	0.213699	0.138022	0.19793	0.118596	0.242986	0.132699	0.175012	0.16605	0.16605	0.16359	0.142014	0.161441	0.316672	0.326904	0.168367
2497-25-8	C10H18O	154.25	11.594	Oxygenated monoterpenoids	(Z)-2-Decenal	1250	0.867951	0.813824	1.16061	1.13479	1.1576	1.21831	1.01692	1.42227	1.2025	1.29685	1.45971	1.62208	1.90134	1.62346	1.55294	1.26542	1.27697	1.40244	2.05108	1.77186	1.72133	1.33437	1.1846	1.6377	1.36084	1.60933	1.4106	1.29953	1.18053	1.18053	1.66252	1.35562	1.13513	1.1434	1.18978	1.18741
5392-40-5	C10H16O	152.23	11.703	Oxygenated monoterpenoids	Citral	1272	1.02715	0.866899	1.2205	1.32324	0.994268	1.18464	1.22557	1.62926	1.51362	1.84577	1.6408	1.80186	2.74562	2.13201	2.20979	1.80224	1.93618	2.34211	2.35292	2.47994	2.66348	2.02128	1.98216	1.82127	1.8434	2.42265	1.92076	1.67799	1.29879	1.29879	1.90077	1.88273	1.67978	1.40576	1.52194	1.66201
28785-06-0	C10H12O	148.2	12.756	Aromatics	4-Propylbenzaldehyde	1291	0.125643	0.128823	0.187771	0.169953	0.146139	0.168318	0.149548	0.18657	0.158063	0.236754	0.281561	0.253457	0.416682	0.340881	0.340803	0	0.26359	0.266375	0.329368	0.300742	0.356775	0.208885	0.210022	0.215834	0.242436	0.33182	0.249036	0.248943	0.237847	0.237847	0.373192	0.317102	0.315961	0.518998	0.45054	0.552497
54211-15-3	C9H14	122.21	13.299	Aliphatics	8-Methylenebicyclo[5.1.0]octane	1330	0.0218366	0.0368683	0.0520757	0.025628	0.0133247	0.012816	0.00912089	0.0216478	0.013571	0.036058	0.0181338	0.0700079	0.0885636	0.0878506	0.0921046	0.111581	0.134381	0.169928	0.200875	0.132917	0.140197	0.0906462	0.0899113	0.107641	0.128262	0.182751	0.0978802	0.0398409	0.0338833	0.0338833	0.0907502	0.105003	0.0787391	0.046781	0.0512087	0.011895
51932-70-8	C10H10O	146.19	13.631	Aromatics	2,3-Dihydro-1H-indene-4-carbaldehyde	1355	0.0844189	0.0948807	0.100889	0.10537	0.08853	0.0801941	0.0615712	0.10362	0.0776506	0.0806729	0.110647	0.106365	0.0526253	0.0459769	0.0490862	0.0642734	0.0589608	0.0643151	0.0543102	0.0572446	0.0495032	0.0472909	0.0380631	0.0852503	0.0487065	0.0713808	0.0408164	0.167295	0.143912	0.143912	0.133498	0.0738967	0.0820379	0.164702	0.132593	0.161265
496-14-0	C8H8O	120.15	14.06	Aromatics	Phthalan	1360	0.178281	0.196511	0.264712	0.222849	0.186384	0.205922	0.195445	0.209054	0.195993	0.272808	0.340157	0.309176	0.445361	0.358214	0.379151	0.244202	0.235875	0.242534	0.300161	0.250563	0.301374	0.205505	0.228108	0.171905	0.280521	0.370124	0.282788	0.265165	0.266189	0.266189	0.320816	0.305935	0.298497	0.259913	0.231298	0.229999
123-35-3	C10H16	136.23	14.564	Monoterpenoids	β-Myrcene	1369	0	0.0235886	0	0.0250892	0.0199514	0	0.0113155	0	0.0258971	0	0	0.0447578	0	0	0	0	0	0	0.0435821	0.0213383	0.0257007	0.0532839	0	0.072148	0	0.0105145	0	0	0	0	0	0	0	0	0	0
101-39-3	C10H10O	146.19	14.587	Aromatics	α-Methylcinnamaldehyde	1372	0.0622645	0.0621142	0.0482908	0.0710476	0.0562248	0.0614638	0.0714181	0.0974449	0.0697447	0.0713572	0.0694998	0.0447578	0.106044	0.0764358	0.0717935	0.0684938	0.0894066	0.0681183	0.0481803	0.0558241	0.066488	0.0536658	0.0580918	0.0557162	0.0669728	0.0891783	0.0663273	0.106975	0.105679	0.105679	0.147137	0.0985032	0.157494	0.310872	0.266088	0.302085
33156-92-2	C11H16	148.24	16.372	Aromatics	6-[(Z)-1-Butenyl]-1,4-cycloheptadiene	1406	0.0198614	0	0	0.0254565	0.0134425	0.0111024	0	0.0175	0.0128231	0.0294987	0.0244546	0.0339679	0.0407692	0	0.0343796	0.0303556	0	0	0.0181794	0.029166	0.0235474	0	0	0	0.0160261	0.0226696	0.0161181	0	0	0	0	0	0	0	0	0
4826-62-4	C12H22O	182.3	17.339	Aliphatics	(E)-2-Dodecenal	1442	0.49767	0.528697	0.725373	0.694394	0.689211	0.706225	0.589901	0.869889	0.643136	0.688045	0.827002	0.837281	0.869178	0.731475	0.77351	0.745721	0.676881	0.682104	0.789272	0.795328	0.937836	0.628492	0.58057	0.664281	0.674693	0.976444	0.605575	0.775299	0.709076	0.709076	0.761303	0.640776	0.64637	0.528587	0.575484	0.57477
23986-74-5	C15H24	204.35	17.596	Sesquiterpenoids	(-)-Germacrene D	1457	0.00896136	0.0159788	0	0.0127829	0.0106361	0.0125135	0.00997198	0.0123249	0.0108288	0	0	0.0149031	0	0	0	0.0341053	0	0	0.0214905	0.0195378	0.0255214	0.0171057	0	0.0217416	0.0196004	0.0254669	0.0123143	0	0	0	0	0	0.0154625	0	0.0154688	0
13744-15-5	C15H24	204.35	17.774	Sesquiterpenoids	β-Cubebene	1479	0.0155472	0.025868	0.0209641	0.0258093	0.0260011	0.0337377	0.016074	0.0275264	0.024825	0	0	0.0332131	0.0208337	0.0285718	0.0147877	0.0298698	0.0285623	0.0268751	0.0230864	0.0323713	0.0352533	0.0225682	0.0225445	0	0.0256176	0.0327096	0.0214177	0.020131	0.0335579	0.0335579	0.0425581	0.016896	0.0232879	0.0157506	0.0171575	0
30021-74-0	C15H24	204.35	18.603	Sesquiterpenoids	γ-Muurolene	1499	0.0173594	0.0428187	0.0120595	0.0287845	0.0240319	0.0251231	0.024601	0.0308406	0.0258189	0	0	0.0299421	0.032953	0	0.0175438	0.0588441	0.0469294	0.0377035	0.0392622	0.0398035	0.052874	0.0273107	0.0410232	0.0437624	0.0339549	0.0601129	0.0181035	0.0210066	0.028922	0.028922	0	0	0.0217631	0.0119538	0.0249412	0
40716-66-3	C15H26O	222.37	19.571	Oxygenated sesquiterpenoids	Nerolidol	1514	0.260058	0.154867	0.288776	0.306732	0.218656	0.272591	0.226846	0.35736	0.164825	0.326202	0.319373	0.232316	0.26126	0.250592	0.347578	0.245401	0.237382	0.240638	0.218358	0.258919	0.295086	0.25391	0.170702	0.195215	0.179283	0.215017	0.247921	0.308745	0.306071	0.306071	0.306787	0.246579	0.268433	0.304257	0.303318	0.355624
60609-53-2	C17H32O	252.4	21.722	Aliphatics	(Z)-14-Methylhexadec-8-enal	1730	0	0.00968279	0	0.0106174	0.0070475	0.0068172	0	0.0133791	0	0	0	0	0	0	0.00958116	0.0245932	0.0240035	0.0218422	0.0161824	0.0196526	0.0182688	0.0126584	0	0	0.0072629	0.0147388	0	0	0	0	0	0	0	0	0	0
